# Supplementary material for: Multicolor ELISA based on alkaline phosphatase-triggered growth of Au nanorods
Source: Royal Society of Chemistry journal article supplement (doi:10.1039/c6an00117c), 2016-01-01
Supplement: c6an00117c1.pdf [file c6an00117c1.pdf]

## Supporting Information:

### **Multicolor ELISA based on alkaline phosphatase-triggered growth of Au nanorods**

Yanyan Li,<sup>a</sup> Xiaoming Ma,<sup>a</sup> Zhengming Xu,<sup>a</sup> Meihua Liu,<sup>b</sup> Zhenyu Lin,<sup>a\*</sup> Bin Qiu,<sup>a</sup>

Longhua Guo<sup>a\*</sup> and Guonan Chen<sup>a</sup>

<sup>a</sup> Institute of Nanomedicine and Nanobiosensing; The Key Lab of Analysis and  
Detection Technology for Food Safety of the MOE and Fujian Province; College of  
Chemistry, Fuzhou University, Fuzhou, 350116, China.

<sup>b</sup> Fuqing Branch of Fujian Normal University, Fuqing, Fujian 350300, China

\* To whom correspondence should be addressed. E-mail: [guolh@fzu.edu.cn](mailto:guolh@fzu.edu.cn)

(Longhua Guo); [zylin@fzu.edu.cn](mailto:zylin@fzu.edu.cn) (Zhenyu Lin); Tel: +86-591-22866164; Fax: +86-  
591-22866135

Figure S1

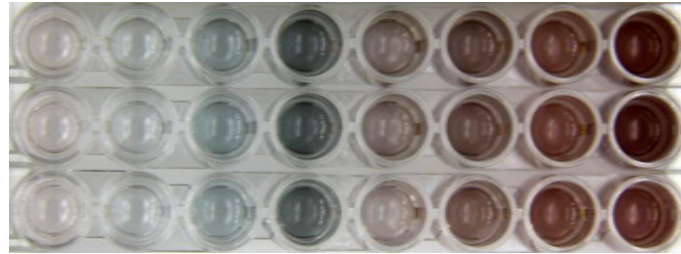

Figure S1 Photographs of the AuNRs growth solution after the addition of different amount of ALP-antibody conjugates. The original solution of ALP-antibody conjugates in the ELISA kit was diluted for 2500 times with 1 mM Tris-HCl buffer (pH7.4) . The amounts of diluted ALP-antibody conjugates added from left to right were 0, 10, 20, 30, 40, 50, 60, 70  $\mu\text{L}$ , respectively, and three replicates were conducted for each sample.
